# Supplementary material
Source: PubMed Central journal article supplement (PMC4886857)
Supplement: NIHMS786221-supplement-suppl_.pdf [file NIHMS786221-supplement-suppl_.pdf]

**Current Biology, Volume 21**

**Supplemental Information**

**Heme Synthesis by Plastid**

**Ferrochelatase I Regulates**

**Nuclear Gene Expression in Plants**

**Jesse D. Woodson, Juan M. Perez-Ruiz, and Joanne Chory**

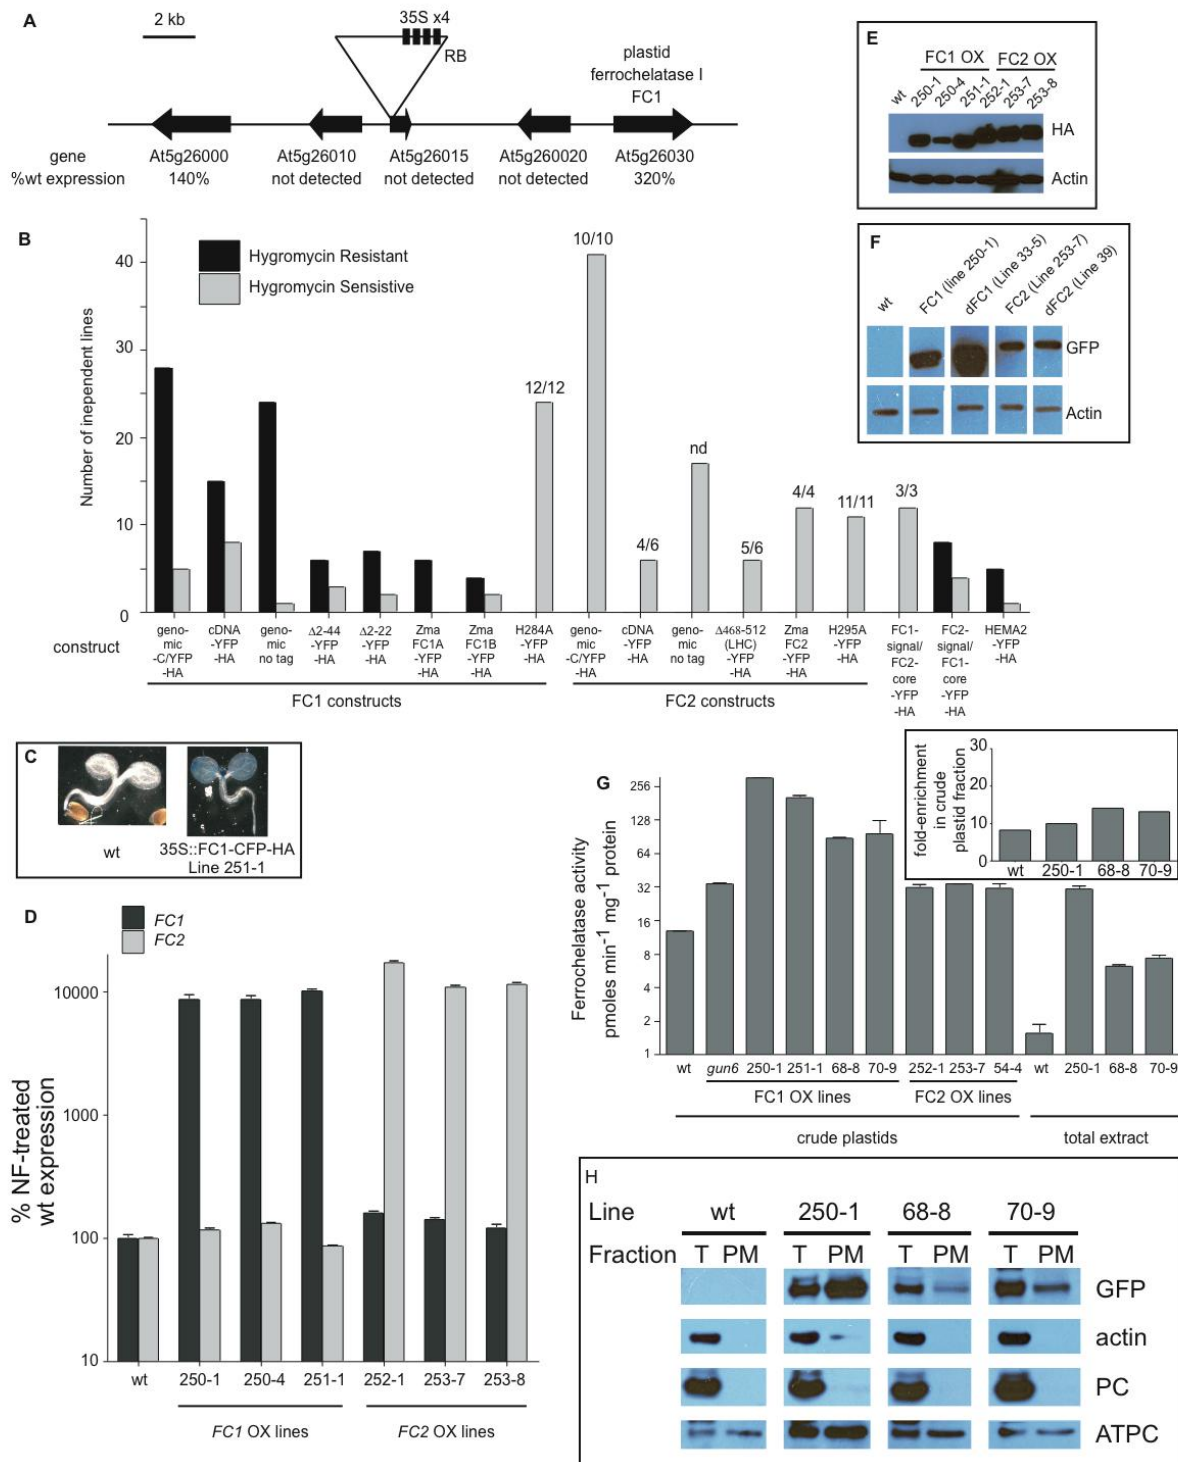

Figure S1.

**Figure S1. Phenotypes of *gun6-1D* and Other Ferrochelatase Transgenic Lines (Related to Figure 1)**

(A) Schematic of the 24 kb region of chromosome five surrounding the causative T-DNA in *gun6-1D* mutants. Genes are indicated by arrow boxes that are labeled underneath. mRNA transcript levels (relative to wt) are indicated below. For genes At5g26010, At5g26015, and At5g26020 no transcript could be detected in either genotype. The right border of T-DNA (RB) still contained multimerized 35S enhancer elements.

(B) Shown is the distribution of *gun* mutants among the various stable transgenic *Arabidopsis* over-expression lines used in this study. The *gun* phenotype of these lines was assessed by scoring the growth phenotype of ~30 NF-treated T2 seedlings from independent T1 lines when challenged with hygromycin. All lines contain the pOCA107-2 [1] that contains a hygromycin resistance cassette under the control of a minimal *LHCBI.2* promoter. After seven days, a seedling with a *gun* phenotype will de-repress *LHCB*, induce hygromycin resistance, and will still be growing. Conversely, seedlings with a wt phenotype will have repressed *LHCB* expression, will not induce hygromycin resistance, and will die. Lines were scored as resistant (*gun* mutants) if at least 25% of the T2 seedlings were hygromycin resistant. The total number of lines is indicated on the y-axis. When constructs did not result in any lines with a *gun* phenotype, C/YFP expression was measured by confocal microscopy. The number of lines with protein accumulation (Lines with C/YFP expression/Total number of lines checked) are indicated above the bars. The use of *Zea mays* (*Zma*) genes is indicated.

(C) Histochemical staining of NF-treated seedlings with the *uidA* (*GUS*) gene under the control of the *LHCBI.2* minimal promoter. Blue color indicates tissue where *LHCB* promoter is de-repressed.

(D) Shown is the level of mRNA transcript accumulation in *FCI*- and *FC2*-OX lines. RT-qPCR analysis of steady-state mRNA transcript levels was measured in 7-day old NF-treated seedlings. Data shown are the mean +/- SEM of triplicate reactions of a representative experiment.

(E) Western blot analysis of ferrochelatase protein from overexpression lines and

(F) Catalytically inactive ferrochelatase protein. An equal amount of total protein was fractioned by SDS-PAGE and blotted. Filters were probed with antibodies specific for the proteins indicated to the right.

(G) Ferrochelatase activity in 5 day old NF-treated seedling (total and crude plastid) extracts. Activity was measured using the codeuteroporphyrin assay and calculated by determining the amount of substrate used  $\text{min}^{-1} \text{mg}^{-1}$  protein. Data shown are the mean +/- SEM of duplicate reactions of a representative experiment. The inset shows the fold-enrichment in crude plastid ferrochelatase activity compared to total extracts.

(H) Western blot analysis of enriched plastid membrane fractions from NF-treated seedlings; T, total protein; PM, plastid membrane fraction. Protein from Total (T) (15 ug) and Plastid Membrane (PM) (6 ug) fractions were fractioned by SDS-PAGE and blotted. Filters were probed with antibodies specific for the proteins indicated to the right. Plastocyanin (PC) and ATPC were used as controls for soluble and membrane-bound plastid protein content, respectively.

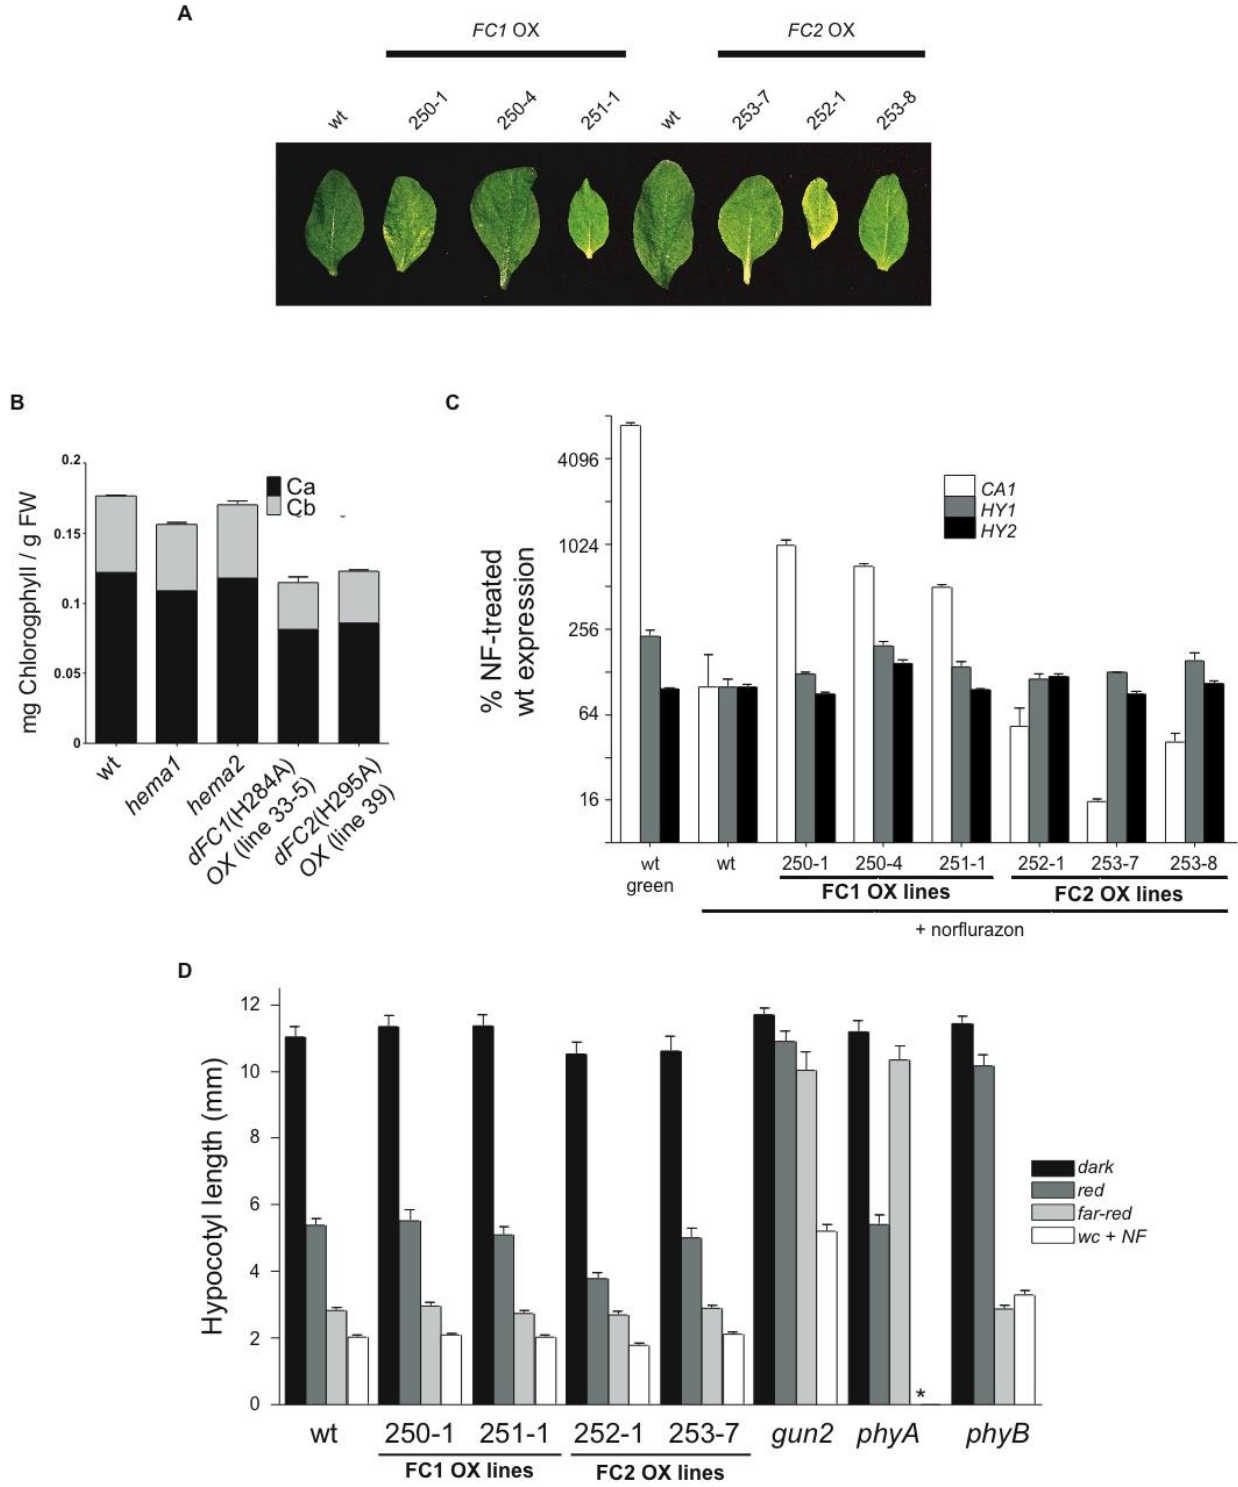

**Figure S2.**

**Figure S2. Effects of *FC1* and *FC2* Overexpression on the Tetrapyrrole Pathway (Related to Figure 2)**

(A) Shown are the first cauline leaf of four-week-old *FC1* and *FC2* overexpression lines (indicated above the image).

(B) Chlorophyll levels of 3-day-old seedlings grown under cycling conditions (16 hours light/8 hours dark) of  $65 \mu\text{mol}/\text{m}^2/\text{s}$  without sucrose supplementation. Data shown are the mean  $\pm$  SEM of biological duplicates.

(C) RT-qPCR analysis of steady-state *HY1* and *HY2* mRNA transcript levels of 7-day old NF-treated seedlings. Data shown are the mean  $\pm$  SEM of triplicate reactions of a representative experiment.

(D) Effect of light on hypocotyl elongation. Shown are the lengths of hypocotyls (mm) of mutants and *FC OX* lines after 4 days in continuous dark, red ( $1 \mu\text{mol}/\text{m}^2/\text{s}$ ), far-red ( $1 \mu\text{mol}/\text{m}^2/\text{s}$ ), or white light (wc) ( $7.5 \mu\text{mol}/\text{m}^2/\text{s}$ ) at  $22^\circ\text{C}$ . Seedlings grown in white light were also treated with  $5 \mu\text{M}$  NF and failed to green.  $n \geq 13$  seedlings. Data shown are the mean  $\pm$  SEM of biological duplicates. \*Not determined.

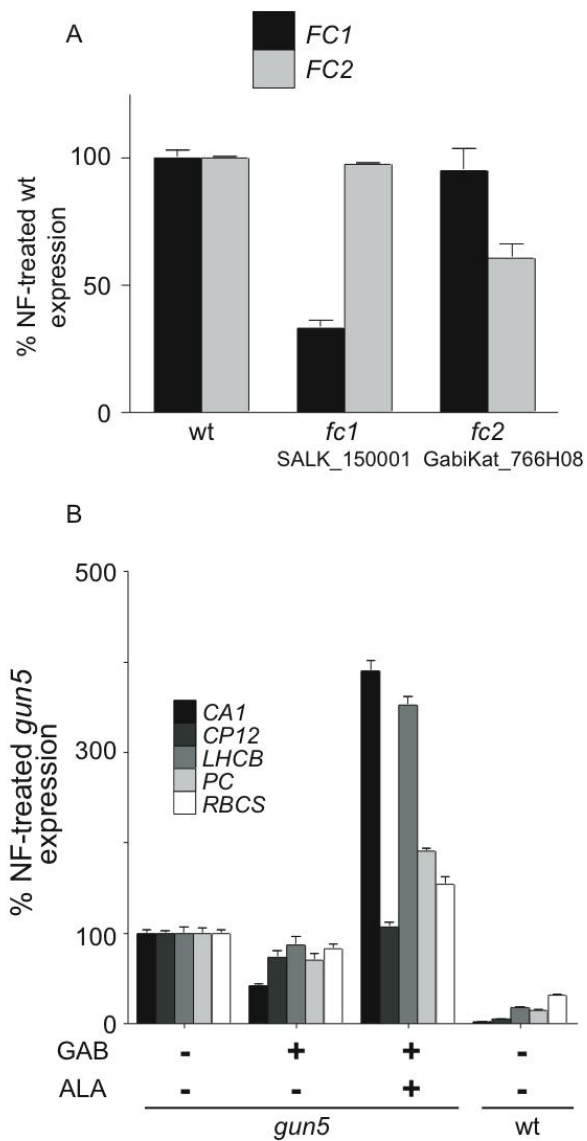

**Figure S3. Analysis of Transcript Levels in NF-Treated Seedlings (Related to Figure 3)**

RT-qPCR analysis of NF-treated seedlings.

(A) Steady-state *FC1* and *FC2* mRNA transcript levels in T-DNA knockdown lines.

(B) Six-day-old *gun5* seedlings were treated with 0.5 mM GAB and 1 mM ALA for 24 hr as indicated. Data shown are the mean +/- SEM of triplicate reactions of a representative experiment.

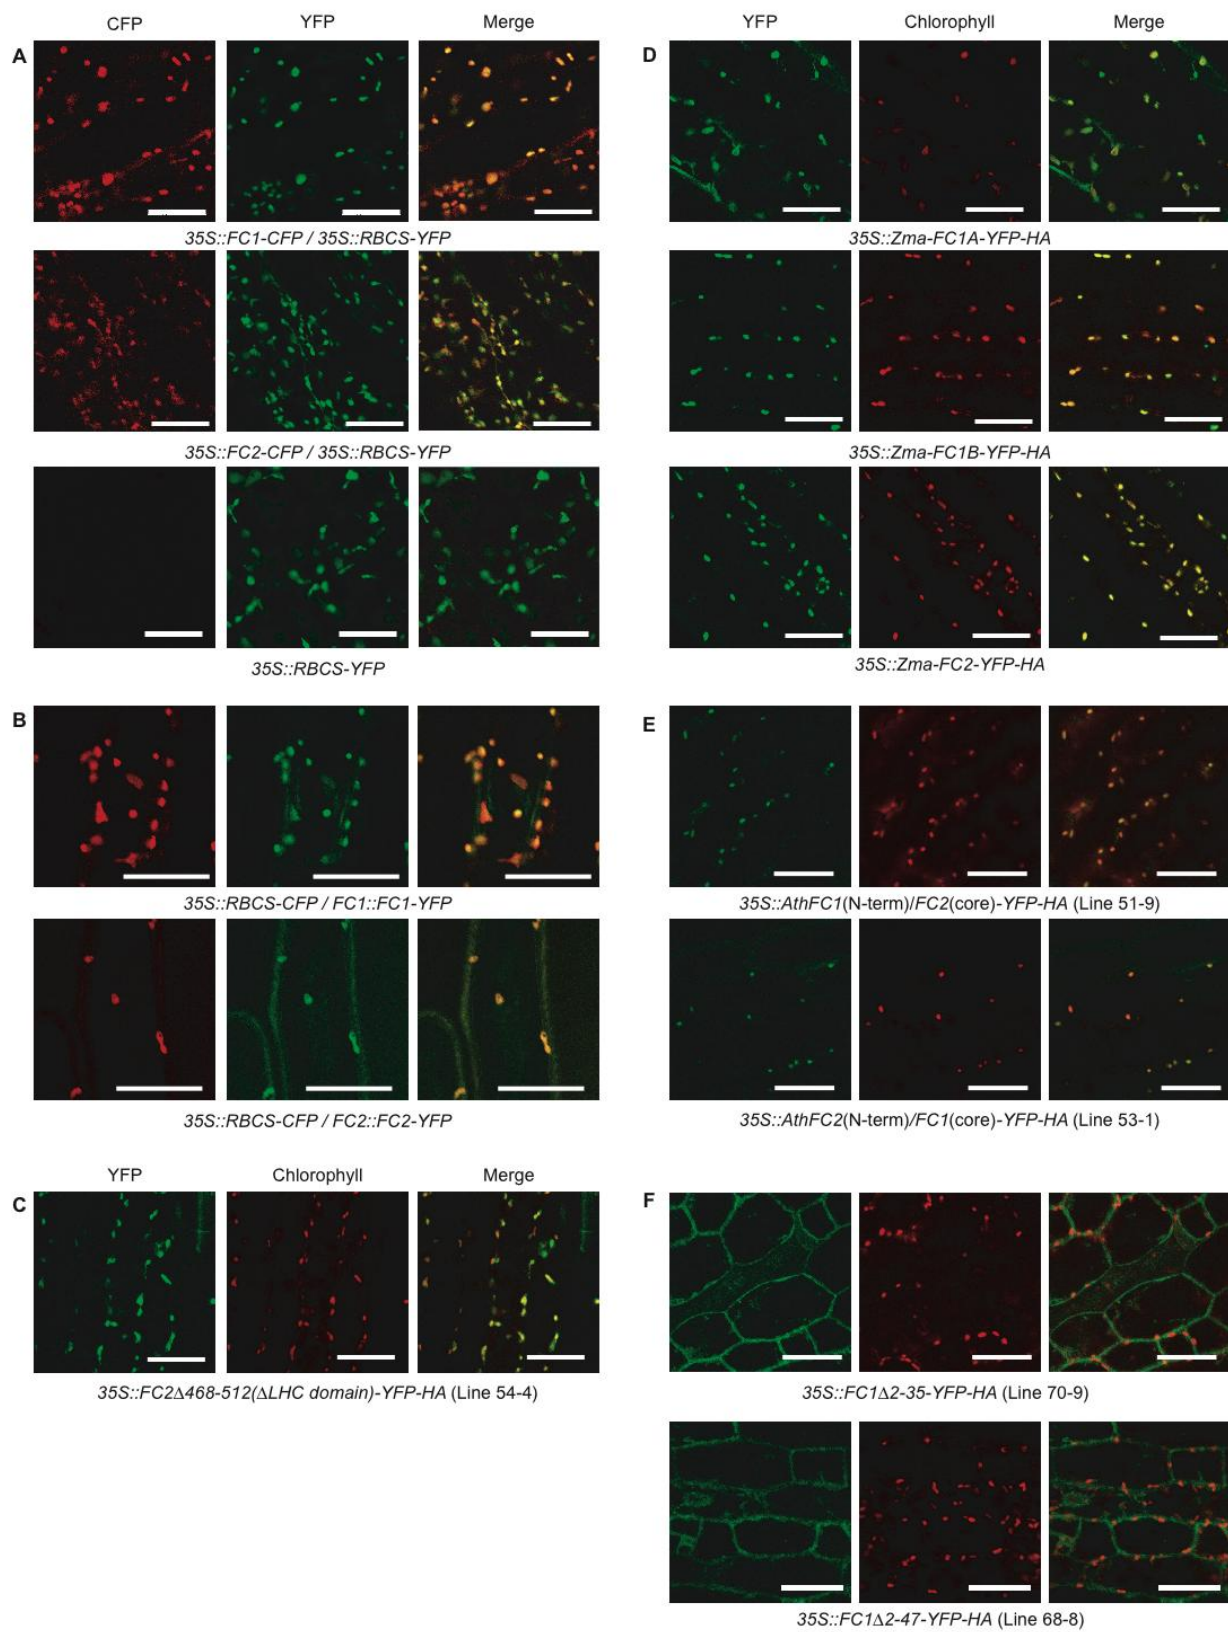

**Figure S4.**

**Figure S4. Plastid Localization of Overexpressed and Natively Expressed FC1 and FC2 (Related to Figure 4)**

(A) Overexpressed FC1- and FC2-CFP colocalizes with YFP fused to the tobacco RBCS N-terminal sorting signal [2].

(B) FC1- and FC2-YFP expressed by their respective native promoters colocalize with CFP fused to the tobacco RBCS N-terminal sorting signal.

(C-E) Overexpressed FC2-YFP-HA lacking the LHC domain ( $\Delta$ 468-512) (C), overexpressed *Z. mays* FC1A-YFP-HA, FC1B-YFP-HA, FC2-YFP-HA (D), and overexpressed hybrid *Arabidopsis* FC1-YFP-HA and FC2-YFP-HA proteins with swapped N-terminal sorting signals (E) are localized to plastids.

(F) Overexpressed FC1-YFP-HA lacking the N-terminal plastid localization signal peptide ( $\Delta$ 2-35/ $\Delta$ 2-47) is not localized to a single compartment. Plastid localization was confirmed by overlay of YFP signal with chlorophyll auto fluorescence using confocal microscopy. The yellow color in the digitally merged images indicates colocalization. Scale bars represent 30  $\mu$ m.



## Supplemental Experimental Procedures

### Growth of Bacterial Strains

For cloning purposes, *E. coli* and *Agrobacterium tumefaciens* strains were grown in liquid Miller nutrient broth or solid medium containing 1.5% agar (w/v). Cells were grown at 37°C (*E. coli*) or 28°C (*A. tumefaciens*) with the appropriate antibiotics. Liquid medium was shaken at 225 rpm.

### GUS Staining

Seven-day-old NF-treated seedlings were soaked in cold 90% acetone for 20 min and then vacuum infiltrated with 2 mM 5-bromo-4-chloro-3-indolyl  $\beta$ -D-glucuronide (X-Gluc), 10 mM potassium ferrocyanide, 10 mM potassium ferricyanide, 0.2 % (w/v) Triton X-100, in 500 mM sodium phosphate, pH 7.2. Tissue was incubated at 37°C for 24 hr before images were taken.

### *gun* Activation-Tagging Mutant Screen

Flowering Col-0/107 plants were transformed with the pSKI015 plasmid containing multimerized Cauliflower Mosaic Virus (CaMV) 35 enhancer elements and a Basta herbicide selection marker [39]. Transformation was accomplished by dipping *Arabidopsis* flowers in a stationary culture of *A. tumefaciens* that had been washed in MS medium containing 5% sucrose and 0.03% Silwet L-77 (v:v) (Osi Specialities Inc.). Plants were then kept covered in the dark for 1 day before being returned to greenhouse conditions. Seeds were then harvested and sown on medium containing Basta to select for T1 generation transformants. T1 plants were then grown normally and seeds were collected from individual plants. About 30 T2 generation seeds from 20,000 individual T1 lines were germinated on medium containing 2% sucrose, 5  $\mu$ M norflurazon, and 20  $\mu$ g/ml of hygromycin. Seedlings were grown for seven days in 25  $\mu$ mol/m<sup>2</sup>/s continuous light, and hygromycin-resistant seedlings were transferred to medium without drug for recovery. Once seedlings had greened, they were transferred to soil and seeds were collected for analysis. One candidate, called *gun6-1D* in this study, was isolated by this method and used for further study. 100% of T3 and F1 seedlings (backcrossed to wt) were hygromycin resistant during NF-treatment indicating a dominant gain-of-function mutation.

The *Arabidopsis* genome sequence flanking T-DNA's in the *gun6-1D* mutant were obtained according to [39]. Briefly, genomic DNA from *gun6-1D* mutant seedlings was extracted using the C-TAB method [40]. Total DNA was digested with either HindIII, EcoRI, or BamHI restriction enzymes, ligated, and transformed into *E. coli*. Kanamycin resistant colonies were isolated and their plasmids were sequenced using T-DNA specific primers described in [39]. The location of T-DNA's was confirmed by PCR and sequencing to be inserted into gene At5g26015 replacing six bases upstream of its start codon and the first 68 bases of its coding region (Figure S1A).

### Construction of Overexpression Plasmids

Plasmids and plant lines used in this study are listed in Supplemental Experimental Procedures. DNA fragments were amplified by using Phusion enzyme (Finnzymes Espoo, Finland) using either wt *Arabidopsis* genomic DNA or cDNA or wt *Z. mays* cDNA as template. The Primers used are listed in Supplemental Experimental Procedures. DNA fragments were gel-purified using the QIAquick Gel Extraction Kit (Qiagen) and cloned into the Gateway compatible vector pENTR-D/TOPO (Invitrogen) according to the manufacturer's instructions.

Directed mutagenesis of *FC1* and *FC2* genes was achieved by designing anti-parallel primers with the desired nucleotide change near the center. Using plasmids pJDW5 (*FC1*) and pJDW7 (*FC2*) as templates, mutagenized plasmid was amplified using *pfu* turbo (Stratagene). Reactions were treated with *DpnI* and plasmid was transformed into *E. coli*. Single colonies were selected and plasmids were sequenced to confirm the mutation was present.

To generate hybrid *FC1* and *FC2* genes, sequence encoding the FC1 N-terminus (amino acids 1-88), FC1 core (amino acids 89-466), FC2 N-terminus (amino acids 1-99), and FC2 core (amino acids 100-512) were amplified separately from cDNA with introduced in-frame BamHI sites at the 3' end of the N-terminal encoding fragments and the 5' end of the core protein encoding fragments. DNA fragments were digested with BamHI and ligated in the desired combinations. Flanking primer pairs were used to amplify the hybrid fragment that was gel-purified and cloned as described above.

The cloned DNA fragments were then transferred to the 35S overexpression vectors (pEARLEYGATE100-2) [41] or promoter-less vectors pGBGWC/Y [42] using LR clonase (Invitrogen) according to manufacturer's instructions. Plasmids were then transformed into the *A. tumefaciens* strain GV301 and these cells were used to transform *Arabidopsis*.

TargetP 1.1 program ([www.cbs.dtu.dk/services/TargetP/](http://www.cbs.dtu.dk/services/TargetP/)) was used to predict that amino acid residue 35 is the cleavage site of the FC1 N-terminal plastid sorting signal. The two FC1 N-terminal deletion constructs used in this study begin at residues 36 and 48 in order to exclude the entire plastid sorting signal.

### **Heme Measurements**

Total non-covalently-bound heme (normalized to fresh weight) was extracted from 7-day old seedling shoots by homogenizing liquid N<sub>2</sub>-frozen tissue in acetone with 2% HCL (v:v) and cell debris was removed by centrifugation at 10,000 x g for 20 min at 4°C. Samples were diluted 1:100 in 100 mM Tris-Cl pH 8.4. Heme content was measured by the chemiluminescence-based method described by [38] that measures reconstituted activity from apo-horseradish peroxidase (Biozyme, Blaenovan, Wales). A Promega Glomax 96 microplate luminometer was used to measure luminescence.

### **Hypocotyl Measurements**

After a five day vernalization period at 4°C, seeds were germinated by exposing to 75 μmol/m<sup>2</sup>/s white light at 22°C for 2 hr and then placed under the appropriate light conditions. After 4 days, at least 13 seedlings of each sample group was placed on a transparency sheet and scanned to a digital image file. Hypocotyl lengths were calculated using ImageJ 1.42q software (<http://rsbweb.nih.gov/ij/>).

### **Ferrochelatase Assay**

Total protein extracts and crude plastid fractions were made from 5 day old NF-treated seedlings as described [43] except that plastids were pelleted at 4,000 x g to exclude other organelles. Ferrochelatase activity was monitored using the codeuteroporphyrin IX assay [43] that measures the aerobic synthesis of codeuteroporphyrin IX from cobalt and deuteroporphyrin IX (Frontier Scientific, Logan, UT). 1 mg of total protein was added to each reaction and deuteroporphyrin consumption was monitored over time by stopping the reaction with 30-fold dilution in 80% acetone (v:v) and measuring fluorescence in a Tecan Safire<sup>2</sup> fluorimeter. Excitation and

fluorescence wavelengths of 400 nm and 620 were used, respectively. Known concentrations of deuteroporphyrin IX dissolved in 80% acetone were used to calibrate the fluorimeter.

### **Protein Extraction and Western Blot Analysis**

Seedlings were frozen in liquid N<sub>2</sub> and homogenized in extraction buffer (50 mM Tris-Cl pH 8.0, 150 mM NaCl, 0.5% Nonidet P-40 (v:v), and protease inhibitors (Roche)). Cell debris was removed by centrifugation at 10,000 x g for 20 min at 4°C. Total protein concentration was measured using the Bradford assay (Bio-Rad) and 20 µg of each sample was loaded into a 4-20% SDS-PAGE gel and proteins were fractionated by electrophoresis and then transferred to nitrocellulose membranes (Bio-Rad). Filters were incubated with specific primary and secondary antibodies. Detection was performed using the Super Signal West Pico Chemiluminescent Substrate (Thermo Scientific Rockford, IL). Monoclonal HA and Actin antibodies were purchased from Roche (Basel, Switzerland) and MP Biomedicals (Solon, OH), respectively. Polyclonal plastocyanin (PC), ATPC, and Rubisco large subunit (RBCL) were purchased from Agrisera (Vännäs, Sweden). Polyclonal GFP antibodies were produced in our laboratory.

Plastid-enriched extracts were prepared from 200 mg of 5-day old NF-treated that were frozen in liquid N<sub>2</sub>, homogenized, re-suspended in isolation buffer (10 mM Tris-Cl pH 8.0, 10 mM MgCl<sub>2</sub>, 400mM Sucrose, 0.1 mM phenylmethylsulfonyl fluoride and protease inhibitors (Roche)), and incubated for 10 min on ice. Cell debris was removed by centrifugation at 500 x g for 5 min at 4 °C and supernatant (total protein) was re-centrifuged (4,000g, 10 min). The resulting pellet, enriched in plastids, was washed with isolation buffer three times and re-suspended in lysis buffer (62.5 mM Tris-Cl, pH 8.0, 2 mM MgCl<sub>2</sub>) to disrupt the chloroplasts. To ensure the rupture of thylakoids, samples were subjected to freeze-thaw cycles and centrifuged 75,000 x g for 45 min to separate supernatant (soluble fraction) and pellet (envelope and thylakoid membranes). To remove any possible residual soluble proteins from the membranes, the pellet was re-suspended in lysis buffer and an additional spin of 20 min at 75,000 x g was performed. The resulting pellet (plastid membrane fraction), was re-suspended in Lysis buffer containing 0.5% w/v Nonidet P-40. Protein from Total (15ug) and Plastid Membrane (6ug) fractions were separated by 4-12% SDS-PAGE, transferred to Nitrocellulose membrane (Bio-Rad) and immunoblotted with the specified antibodies.

***Arabidopsis* Mutants Used in This Study**

| Mutant                                        | Gene / protein                                                    | Mutation                    | notes                               | Ref        |
|-----------------------------------------------|-------------------------------------------------------------------|-----------------------------|-------------------------------------|------------|
| <i>gun2-1</i>                                 | At2g26670 ( <i>HY1</i> ) /<br>Heme oxygenase                      | EMS                         |                                     | [1]        |
| <i>gun4-1</i>                                 | At3g59400 / GUN4                                                  | EMS,<br>L88F                |                                     | [1]        |
| <i>gun5-1</i>                                 | At5g13630 ( <i>CHLH</i> ) /<br>Mg-chelatase subunit<br>H          | EMS,<br>A990V               |                                     | [1, 3]     |
| <i>gun6-1D</i>                                | increases expression of<br>At5g26030 /<br>Ferrochelatase 1        | Activation<br>tag T-<br>DNA | dominant<br><i>gun</i> mutant       | This study |
| <i>lin2</i>                                   | At1g03475 ( <i>HEMF1</i> ) /<br>Coproporphyrinogen<br>III oxidase | T-DNA,<br>5'-UTR            |                                     | [4]        |
| <i>fc1</i><br>(SALK_150001)                   | At5g26030 /<br>Ferrochelatase 1                                   | T-DNA,<br>5'-UTR            |                                     | [5]        |
| <i>fc1</i><br>(GabiKat_110D02)<br>null mutant | At5g26030 /<br>Ferrochelatase 1                                   | T-DNA,<br>exon 3/8          | Unable to<br>obtain<br>homozygotes  | This study |
| <i>fc2</i><br>(GabiKat_766H08)                | At2g30390 /<br>Ferrochelatase 2                                   | T-DNA,<br>5'-UTR            |                                     | This study |
| <i>hema1</i><br>(SALK_056220)                 | At1g58290 /<br>Glutamate tRNA<br>reductase 1                      | T-DNA,<br>5'-UTR            |                                     | This study |
| <i>hema1</i><br>(SALK_053036)<br>null mutant  | At1g58290 /<br>Glutamate tRNA<br>reductase 1                      | T-DNA,<br>exon 3/3          | homozygous<br>is seedling<br>lethal | This study |
| <i>hema2</i><br>(SALK_052000)                 | At1g09940 /<br>Glutamate tRNA<br>reductase 2                      | T-DNA,<br>exon 3/3          |                                     | This study |

### Primers Used in This Study

| Gene                            | Primer orientation/name | Sequence                  |
|---------------------------------|-------------------------|---------------------------|
| <b>RT-qPCR primer pairs</b>     |                         |                           |
| <i>18S rRNA At3g41768</i>       | For. / JP190            | TATAGGACTCCGCTGGCACC      |
|                                 | Rev. / JP191            | CCCGGAACCCAAAACTTTG       |
| <i>Actin2 At3g18780</i>         | For. / JP199            | GCACTTGCACCAAGCAGCAT      |
|                                 | Rev. / JP200            | CCTTTCAGGTGGTGCAACGAC     |
| <i>LHCB 1.2, CAB3 At1g29910</i> | For. / JP197            | GGACTTGCTTTACCCCGGTG      |
|                                 | Rev. / JP198            | TCGGTAGCAAGACCCAATGG      |
| <i>CA1 AT3g01500</i>            | For. / JP209            | TGTGTCCATCACACGTTCTGG     |
|                                 | Rev. / JP210            | GGACCACGAAGGCATCTCCT      |
| <i>RBCS At1g67090</i>           | For. / JP205            | GCAACGGCGGAAGAGTTAAC      |
|                                 | Rev. / JP206            | TCTTCCAATCGGAGGCCA        |
| <i>Plastocyanin At1g76100</i>   | For. / JP203            | TGGTGTTCGACGAAGACGAG      |
|                                 | Rev. / JP204            | AGATCTTGCTTGCCTCCACA      |
| <i>CPI2 At3g62410</i>           | For. / JP271            | CGGACCCTTTGGAGGAATACTG    |
|                                 | Rev. / JP272            | GGCACTCGTTGGTCTCAGGA      |
| <i>Hema1 At1g58290</i>          | For. / JP254            | GCTTCCGCAGTCTTCAAACG      |
|                                 | Rev. / JP255            | CCAGCGCCAATTACACACATC     |
| <i>Hema2 At1g04490</i>          | For. / JP211            | AGCTCCTGCACGGTCCAAT       |
|                                 | Rev. / JP212            | TGCTATCGTTCATCGCAT        |
| <i>FC1 At5g26030</i>            | For. / JP110            | ATACCAGAGTCGTGTTGGCCC     |
|                                 | Rev. / JP111            | TCATCGGTGTATGGCTTCAGC     |
| <i>FC2 At2g30390</i>            | For. / JP239            | TGGTGTATGGCTGTCTCAAAC     |
|                                 | Rev. / JP240            | AGCGGAACTAACGACTGTCGA     |
| <i>HY1 At2g26670</i>            | For. / JP409            | TGCTGGTGGACGAATGATTG      |
|                                 | Rev. / JP410            | TTATCGAGTATCCGCTCTGCC     |
| <i>HY2 At3g09150</i>            | For. / JP411            | AAGCAAAGGCAAAGGAGCTG      |
|                                 | Rev. / JP412            | CATCCACCCATTGAACAGG       |
| <b>Genotyping primers</b>       |                         |                           |
| SALK T-DNA left border          | LB1.3                   | ATTTTGCCGATTTTCGGAAC      |
| GABI-KAT Left border            | Gabi-KAT 08409          | ATATTGACCATCATACTCATTGC   |
| <i>fc1</i> (SALK_150001)        | LP JP138                | TTTTGGATTGAGGAACTTTTACAAC |
|                                 | RP JP139                | AAACTCAATCCACGATTCGTG     |
| <i>fc1</i> (GabiKat_110D02)     | LP JP281                | CACTCTTCCATCTGCTTCTGG     |
|                                 | RP JP282                | GCTCGTTCTGTGACTGGAGAC     |
| <i>fc2</i> (GabiKat_766H08)     | LP JP283                | GAGCAACGCCAAACATAGAAG     |
|                                 | RP JP284                | TCAAAGGCAATGAATGTTTCC     |
| <i>hema1</i> (SALK_056220)      | LP JP235                | TTCCACAAATCTATCCATCGG     |
|                                 | RP JP236                | AAGCAGAGAGCTCACAACGAG     |
| <i>hema1</i> (SALK_053036)      | LP JP237                | CTGAATGGCCAAGAGCTATTG     |
|                                 | RP JP240                | AACCTCTGGAGAAGCTTGAGG     |

|                                                     |                    |                                             |
|-----------------------------------------------------|--------------------|---------------------------------------------|
| <i>hema2</i> (SALK_052000)                          | LP 142             | ATCTCAAATGCTGCATTGGAC                       |
|                                                     | RP JP143           | TGTTTTGGGCATTTCTCATTC                       |
| <i>gun5-1</i>                                       | For (Cac8I digest) | ACCAACCGGTAAAAACATGCATG                     |
|                                                     | Rev                | CTCACACCAATCATCCAAAGAAC                     |
| <b>Cloning primers</b>                              |                    |                                             |
| <i>FC1</i> coding region for Gateway                | For JP115          | CACCATCGGTTCTGAAATTTGTAGCTATG               |
|                                                     | Rev JP118          | TAGGTTCCGGAACGCATGGA                        |
| <i>FC1</i> + native promoter (1700 bp upstream ATG) | For JP219          | CACCTTCAATTACGATAATTCATGGTGTG               |
| FC1 $\Delta$ 2-35                                   | For JP297          | CACCATGTGCGATATAAAAGAGAGATCTT               |
| FC1 $\Delta$ 2-47                                   | For JP295          | CACCATGACTATCACGAATCGTGGATT                 |
| <i>FC2</i> coding region for Gateway                | For JP119          | CACCTCAAGTTTCAATCTTTTTGCAATG                |
|                                                     | Rev JP122          | TAATGAAGGCAAGATGCCCCAC                      |
| <i>FC2</i> + native promoter (1061 bp upstream ATG) | For JP220          | CACCGCTTTCGAAATCATGCAACA                    |
| FC2 $\Delta$ 468-512 ( $\Delta$ LHC)                | Rev JP264          | CATTGTCACCGGTGCTGGTAAC                      |
| <i>HEMA2</i> coding region for Gateway              | For JP216          | CACCAAACCTCAAAATCTATGGCGGTTT                |
|                                                     | Rev JP218          | CTTTTTTCCACCTTTGCTCTAA                      |
| <i>Z. Mays FC1A</i> cDNA for Gateway                | For JP321          | CACCAAGCAGCCCATGTCTTCGT                     |
|                                                     | Rev JP322          | AAGCATGGTGCTCCGGAAG                         |
| <i>Z. Mays FC1B</i> cDNA for Gateway                | For JP325          | CACCCTGCAGGAAGGATCATGGA                     |
|                                                     | Rev JP326          | AAGCATGGTGTTCCGGAAG                         |
| <i>Z. Mays FC2</i> coding region for Gateway        | For JP323          | CACCGGAGGAGAGGGAGAGGATGT                    |
|                                                     | Rev JP324          | GCGGAACAGAGGCAGGATTC                        |
| <i>FC1</i> mutagenesis (H284A)                      | For JP221          | CTTCAGTGCTGCTGGTGTTCGGTC                    |
|                                                     | Rev JP222          | GACCGGAACACCAGCAGCACTGAAG                   |
| <i>FC2</i> mutagenesis (H295A)                      | For JP245          | TTCAGTGCAGCTGGCGTGCCTCTTG                   |
|                                                     | Rev JP246          | CAAGAGGCACGCCAGCTGCACTGAA                   |
| FC1 N-term sorting signal (Residues 1-88)           | Rev JP260          | ATAATAGGATCCATCTTCTGCAACAACATG<br>AGAAC     |
| FC1 core (residues 89-466)                          | For JP261          | ATAATAGGATCCGCTAAGATTGGTGTCTTG<br>CTTTGAATT |
| FC2 N-terminal sorting signal (residues 1-99)       | Rev JP262          | ATAATAGGATCCGGCATCATCAGTGATAA<br>CAGAG      |
| FC2 core (residues 100-512)                         | For JP263          | ATAATAGGATCCAAAATTGGTGTCTTGTTA<br>TTAAACCT  |

### Plasmids Used in This Study

| Plasmid        | Insert                                            | Parent                  | <i>Arabidopsis</i><br>Lines | notes                              | ref        |
|----------------|---------------------------------------------------|-------------------------|-----------------------------|------------------------------------|------------|
| pENTR-D/TOPO   |                                                   |                         |                             | Gateway cloning vector             | Invitrogen |
| PEARLEYGATE101 |                                                   |                         |                             | 35S promoter, C-term YFP-HA fusion | [6]        |
| PEARLEYGATE102 |                                                   |                         |                             | 35S promoter, C-term CFP-HA fusion | [6]        |
| pGBGWC         |                                                   |                         |                             | No promoter, C-term CFP            | [7]        |
| pGBGWY         |                                                   |                         |                             | No promoter, C-term YFP            | [7]        |
| pJDW5          | Genomic <i>FC1</i> coding region w/o stop codon   | pENTR-D/TOPO            |                             |                                    |            |
| pJDW7          | Genomic <i>FC2</i> coding region w/o stop codon   | pENTR-D/TOPO            |                             |                                    |            |
| pJDW10         | <i>35S::FC1-YFP-HA</i>                            | pEARLEYGATE101 + pJDW5  | 250                         |                                    |            |
| pJDW11         | <i>35S::FC1-CFP-HA</i>                            | pEARLEYGATE102 + pJDW5  | 251                         |                                    |            |
| pJDW12         | <i>35S::FC2-YFP-HA</i>                            | pEARLEYGATE101 + pJDW7  | 252                         |                                    |            |
| pJDW13         | <i>35S::FC2-CFP-HA</i>                            | pEARLEYGATE102 + pJDW7  | 253                         |                                    |            |
| pJDW21         | Genomic <i>FC1</i> coding region w/o stop codon   | pJDW5                   |                             | FC1 H284A mutation                 |            |
| pJDW28         | Genomic <i>FC2</i> coding region w/o stop codon   | pJDW7                   |                             | FC2 H295A mutation                 |            |
| pJDW33         | <i>35S::dFC1-YFP-HA</i>                           | pEARLEYGATE101 + pJDW21 | 33                          | FC1 H284A mutation                 |            |
| pJDW39         | <i>35S::dFC1-YFP-HA</i>                           | pEARLEYGATE101 + pJDW28 | 39                          | FC2 H295A mutation                 |            |
| pJDW25         | Genomic <i>HEMA2</i> coding region w/o stop codon | pENTR-D/TOPO            |                             |                                    |            |
| pJDW37         | <i>35S::HEMA2-YFP-HA</i>                          | pEARLEYGATE101 + pJDW25 | 37                          |                                    |            |
| pJDW87         | <i>MzaFC1A</i> cDNA w/o stop codon                | pENTR-D/TOPO            |                             |                                    |            |
| pJDW88         | <i>MzaFC2</i> cDNA w/o stop codon                 | pENTR-D/TOPO            |                             |                                    |            |
| pJDW89         | <i>MzaFC1B</i> cDNA w/o stop codon                | pENTR-D/TOPO            |                             |                                    |            |

|        |                                                                               |                         |    |  |  |
|--------|-------------------------------------------------------------------------------|-------------------------|----|--|--|
| pJDW90 | <i>35S::MzaFC1A-YFP-HA</i>                                                    | pEARLEYGATE101 + pJDW87 | 90 |  |  |
| pJDW91 | <i>35S::MzaFC2-YFP-HA</i>                                                     | pEARLEYGATE101 + pJDW88 | 91 |  |  |
| pJDW92 | <i>35S::MzaFC1B-YFP-HA</i>                                                    | pEARLEYGATE101 + pJDW89 | 92 |  |  |
| pJDW26 | Genomic <i>FC1</i> w/o stop codon + native promoter (1700 bp upstream ATG)    | pENTR-D/TOPO            |    |  |  |
| pJDW27 | Genomic <i>FC2</i> w/o stop codon + native promoter (1061 bp upstream ATG)    | pENTR-D/TOPO            |    |  |  |
| pJDW30 | <i>FC1::FC1-YFP</i>                                                           | PGBGWY + pJDW26         | 30 |  |  |
| pJDW31 | <i>FC2::FC2-CFP</i>                                                           | PGBGWC + pJDW27         | 31 |  |  |
| pJDW32 | <i>FC2::FC2-YFP</i>                                                           | PGBGWY + pJDW27         | 32 |  |  |
| pJDW43 | Fusion of FC1 N-terminal sorting signal and core FC2 (FC1/FC2) w/o stop codon | pENTR-D/TOPO            |    |  |  |
| pJDW45 | Fusion of FC2 N-terminal sorting signal and core FC1 (FC2/FC1) w/o stop codon | pENTR-D/TOPO            |    |  |  |
| pJDW46 | <i>FC2</i> cDNA ( $\Delta$ 468-512)                                           | pENTR-D/TOPO            |    |  |  |
| pJDW51 | <i>35S::FC1(N-term)/FC2(core)-YFP-HA</i>                                      | pENTR-D/TOPO            | 51 |  |  |
| pJDW53 | <i>35S::FC2(N-term)/FC1(core)-YFP-HA</i>                                      | pEARLEYGATE101 + pJDW45 | 53 |  |  |
| pJDW54 | <i>35S::FC2(<math>\Delta</math>468-512)-YFP-HA</i>                            | pEARLEYGATE101 + pJDW46 | 54 |  |  |
| PJDW61 | <i>FC1</i> cDNA ( $\Delta$ 2-47)                                              | pENTR-D/TOPO            |    |  |  |
| PJDW63 | <i>FC1</i> cDNA ( $\Delta$ 2-35)                                              | pENTR-D/TOPO            |    |  |  |
| pJDW68 | <i>35S::FC1(<math>\Delta</math>2-47)-YFP-HA</i>                               | pEARLEYGATE101 + pJDW61 | 68 |  |  |
| pJDW70 | <i>35S::FC1(<math>\Delta</math>2-35)-YFP-HA</i>                               | pEARLEYGATE101 + pJDW63 | 70 |  |  |



### Transgenic Lines Used in This Study

| Line               | Construct                                          | plasmid          | Parent    |     |
|--------------------|----------------------------------------------------|------------------|-----------|-----|
| Col-0/107          |                                                    |                  | Col-0     | [1] |
| 250                | <i>35S::FC1-YFP-HA</i>                             | pJDW10           | Col-0/107 |     |
| 251                | <i>35S::FC1-CFP-HA</i>                             | pJDW11           | Col-0/107 |     |
| 252                | <i>35S::FC2-YFP-HA</i>                             | pJDW12           | Col-0/107 |     |
| 253                | <i>35S::FC2-CFP-HA</i>                             | pJDW13           | Col-0/107 |     |
| 33                 | <i>35S::dFC1-YFP-HA</i>                            | pJDW33           | Col-0/107 |     |
| 39                 | <i>35S::dFC2-YFP-HA</i>                            | pJDW39           | Col-0/107 |     |
| 37                 | <i>35S::HEMA2-YFP-HA</i>                           | pJDW37           | Col-0/107 |     |
| 30                 | <i>FC1::FC1-YFP</i>                                | pJDW30           | Col-0     |     |
| 31                 | <i>FC2::FC2-CFP</i>                                | pJDW31           | Col-0     |     |
| 32                 | <i>FC2::FC2-YFP</i>                                | pJDW32           | Col-0     |     |
| 51                 | <i>35S::FC1(N-term)/FC2(core)-YFP-HA</i>           | pJDW51           | Col-0/107 |     |
| 53                 | <i>35S::FC2(N-term)/FC1(core)-YFP-HA</i>           | pJDW53           | Col-0/107 |     |
| 54                 | <i>35S::FC2(<math>\Delta</math>468-512)-YFP-HA</i> | pJDW54           | Col-0/107 |     |
| 68                 | <i>35S::FC1(<math>\Delta</math>1-47)-YFP-HA</i>    | pJDW68           | Col-0/107 |     |
| 70                 | <i>35S::FC1(<math>\Delta</math>1-35)-YFP-HA</i>    | pJDW70           | Col-0/107 |     |
| 90 (ZmaFC1A)       | <i>35S::ZmaFC1A-YFP-HA</i>                         | pJDW90           | Col-0/107 |     |
| 91 (ZmaFC2)        | <i>35S::ZmaFC2-YFP-HA</i>                          | pJDW91           | Col-0/107 |     |
| 92 (ZmaFC1B)       | <i>35S::ZmaFC1B-YFP-HA</i>                         | pJDW92           | Col-0/107 |     |
| Plastid-CFP marker | <i>35S::TobaccoRBCS(1-79)-CFP</i>                  | pt-cb<br>CD3-994 | Col-0     | [2] |
| Plastid-YFP marker | <i>35S::TobaccoRBCS(1-79)-YFP</i>                  | pt-yb<br>CD3-998 | Col-0     | [2] |

## Supplemental References

1. Susek, R.E., Ausubel, F.M., and Chory, J. (1993). Signal transduction mutants of Arabidopsis uncouple nuclear CAB and RBCS gene expression from chloroplast development. *Cell* *74*, 787-799.
2. Nelson, B.K., Cai, X., and Nebenfuhr, A. (2007). A multicolored set of in vivo organelle markers for co-localization studies in Arabidopsis and other plants. *Plant J.* *51*, 1126-1136.
3. Mochizuki, N., Brusslan, J.A., Larkin, R., Nagatani, A., and Chory, J. (2001). Arabidopsis genomes uncoupled 5 (GUN5) mutant reveals the involvement of Mg-chelatase H subunit in plastid-to-nucleus signal transduction. *Proc. Natl. Acad. Sci. U.S.A.* *98*, 2053-2058.
4. Ishikawa, A., Okamoto, H., Iwasaki, Y., and Asahi, T. (2001). A deficiency of coproporphyrinogen III oxidase causes lesion formation in Arabidopsis. *Plant J.* *27*, 89-99.
5. Nagai, S., Koide, M., Takahashi, S., Kikuta, A., Aono, M., Sasaki-Sekimoto, Y., Ohta, H., Takamiya, K., and Masuda, T. (2007). Induction of isoforms of tetrapyrrole biosynthetic enzymes, AtHEMA2 and AtFC1, under stress conditions and their physiological functions in Arabidopsis. *Plant Physiol.* *144*, 1039-1051.
6. Earley, K.W., Haag, J.R., Pontes, O., Opper, K., Juehne, T., Song, K., and Pikaard, C.S. (2006). Gateway-compatible vectors for plant functional genomics and proteomics. *Plant J.* *45*, 616-629.
7. Zhong, S., Lin, Z., Fray, R.G., and Grierson, D. (2008). Improved plant transformation vectors for fluorescent protein tagging. *Transgenic Res.* *17*, 985-989.
